# Supplementary material
Source: MDPI journal article supplement (https://www.mdpi.com/2073-4344/12/8/884)
Supplement: s1 [file s1]

Table S1 The primers of site-directed mutagenesis

|          | Primer name  | Primer sequence (5'-3')                                     |
|----------|--------------|-------------------------------------------------------------|
| YjiC-mut | YjiC-H16A-F  | GTACGGAG <u>CAG</u> TCAATCCTACGCTTGCTTTAGTAG<br>A           |
|          | YjiC-H16A-R  | GATTGACT <u>TG</u> CTCCGTACGCCGGGATATTG                     |
|          | YjiC-D106A-F | ATG <u>CAT</u> TTTGTTCGCTGGCTGGT                            |
|          | YjiC-D106A-R | CCAGCGCAACAAAT <u>TG</u> CATAGATGATCAGATCAGG<br>CTGATCA     |
|          | YjiC-S277A-F | ACCATTTCGCCAAG <u>CAG</u> TGCCGCAGCTTGAGGTG                 |
|          | YjiC-S277A-R | ACT <u>TG</u> CTTGCGGAATGGTAAAGTTAGCA                       |
|          | YjiC-Q280A-F | AAAGTGTGCCG <u>GCA</u> CTTGAGGTGTTAGAGAAAGC<br>TGATTT       |
|          | YjiC-Q280A-R | AAGT <u>TGCC</u> GGCACACTTTGGCGAAT                          |
|          | YjiC-H293A-F | TTG <u>CAC</u> ATCTCTCATGGCGGGATGA                          |
|          | YjiC-H293A-R | GCCATGAGAGATGT <u>TG</u> CAAATCAGCTTTCTCTAAC<br>ACCTCA      |
|          | YjiC-S298A-F | GATGAAC <u>GCA</u> ACGATGGAAGCGATGAACGC                     |
|          | YjiC-S298A-R | CCATCGT <u>TG</u> CGTTCATCCCGCCATGAGAGA                     |
|          | YjiC-E317A-F | ATGTATG <u>CAC</u> AGGAGCTCACTGCAAATCGG                     |
|          | YjiC-E317A-R | GAGCTCCTGT <u>TG</u> CATACATTTGCGGAATGACGAC                 |
|          | YjiC-Q318A-F | GTATGAGG <u>CAG</u> AGCTCACTGCAAATCGGGT                     |
|          | YjiC-Q318A-R | TGAGCTCT <u>TGC</u> CTCATACATTTGCGGAATGACG                  |
| YojK-mut | Yojk-H14A-F  | GAAGGGG <u>GCA</u> ATTAATCCCTCTATCGGTGTGATGA                |
|          | Yojk-H14A-R  | GGATTAATT <u>TGCC</u> CTTCACCGGGGAAACC                      |
|          | Yojk-D107A-F | ATG <u>CAC</u> ACCATCTTCTCGCGGGTAA                          |
|          | Yojk-D107A-R | CGAGAAGATGGTGT <u>TG</u> CATATATGACATAATCATA<br>CGATTCATGTT |
|          | Yojk-Y288A-F | ATTGTACGCCCCG <u>GCA</u> GTCCCTCAGCTTGAGATCTT<br>GAA        |
|          | Yojk-Y288A-R | ACT <u>TGCC</u> GGGCGTACAATGAAATTCTCC                       |
|          | Yojk-Q291A-F | TGTCCCT <u>TGCA</u> CTTGAGATCTTGAAAAGAGCCAGC                |
|          | Yojk-Q291A-R | TCTCAAGT <u>TG</u> CAGGGACATACGGGCGTACAA                    |
|          | YojK-H304A-F | TATTTGTGACC <u>GCA</u> GGCGGAATGAACAGCACAAG                 |
|          | YojK-H304A-R | GCCT <u>TGC</u> GGTCACAAATAAGCTGGCTCTTTT                    |
|          | YojK-S309A-F | GGAATGAAC <u>GCA</u> ACAAGTGAAGGTTTGTATTTG<br>AAACC         |
|          | YojK-S309A-R | CTTGTT <u>TGC</u> GTTTCATTCCGCCGTGGGT                       |
|          | Yojk-D328A-F | GGAGGCG <u>CA</u> CAATTTGTTGTTCGCAGATCAGG                   |
|          | Yojk-D328A-R | AACAAATTGT <u>TG</u> CGCCTCCCATCGGAATGA                     |
|          | Yojk-Q329A-F | AGGCGAC <u>GCA</u> TTTGTGTTGTTCGCAGATCAGGTAGA               |
|          | Yojk-Q329A-R | ACAACAAAT <u>TGC</u> GTCGCCTCCCATCGGAAT                     |

|        |           |                                              |
|--------|-----------|----------------------------------------------|
| UGT109 | UGT109A3- | GTACGGT <u>GC</u> AGTCAACCCTACGCTTGCTTTAGT   |
| A3-mut | H16A-F    |                                              |
|        | UGT109A3- | GGTTGACT <u>GA</u> ACCGTACGCCGGGATATTG       |
|        | H16A-R    |                                              |
|        | UGT109A3- | TCTATG <u>CA</u> TTTGTCTGCGCTGGCTGGA         |
|        | D106A-F   |                                              |
|        | UGT109A3- | GCGCGACAAAT <u>TG</u> CATAGATGATCAGATCAGGCTG |
|        | D106A-R   | ATCA                                         |
|        | UGT109A3- | ACCATTTCGCCAA <u>GCA</u> GTGCCCCAGCTTGAGGTGT |
|        | S277A-F   |                                              |
|        | UGT109A3- | ACT <u>TGCT</u> TGGCGAATGGTAAAGTGAGC         |
|        | S277A-R   |                                              |
|        | UGT109A3- | CC <u>GCA</u> CTTGAGGTGTTAGAGAAAGCTGATTT     |
|        | Q280A-F   |                                              |
|        | UGT109A3- | TAACACCTCAAGT <u>TGC</u> GGGCACGCTTTGGCGAAT  |
|        | Q280A-R   |                                              |
|        | UGT109A3- | TTGTTTCATCTCC <u>GCA</u> GGCGGGATGAACAGTACGA |
|        | H293A-F   | TG                                           |
|        | UGT109A3- | CCT <u>TGCG</u> GAGATGAACAAATCAGCTTTCTCT     |
|        | H293A-R   |                                              |
|        | UGT109A3- | GATGAAC <u>GCA</u> ACGATGGAAGCGATGAATGC      |
|        | S298A-F   |                                              |
|        | UGT109A3- | CCATCGTT <u>TGCG</u> TTCATCCCGCCATGGGA       |
|        | S298A-R   |                                              |
|        | UGT109A3- | AATGTAT <u>GCA</u> CAGGAGCTCACCGCAAAGC       |
|        | E317A-F   |                                              |
|        | UGT109A3- | GCTCCTGT <u>TGC</u> ATACATTTGCGGAATGACGACA   |
|        | E317A-R   |                                              |
|        | UGT109A3- | GTATGAG <u>GCA</u> GAGCTCACCGCAAAGCGTG       |
|        | Q318A-F   |                                              |
|        | UGT109A3- | TGAGCTCT <u>TGC</u> CTCATACATTTGCGGAATGACG   |
|        | Q318A-R   |                                              |

---

Note: Underlined base pairs indicate mutation sites.
